# Supplementary material for: Amphiphilic conjugated block copolymers as NIR-bioimaging probes
Source: Royal Society of Chemistry journal article supplement (doi:10.1039/d2py00258b), 2022-01-01
Supplement: d2py00258b1.pdf [file d2py00258b1.pdf]

**Supplementary data**

**for**

**Amphiphilic Conjugated Block Copolymers as NIR-Bioimaging Probes**

Axel-Laurenz Buckinx,<sup>a</sup> Ashley Rozario,<sup>a</sup> Toby Bell,<sup>a</sup> Jasper Michels<sup>b</sup> and Tanja Junkers<sup>a</sup>

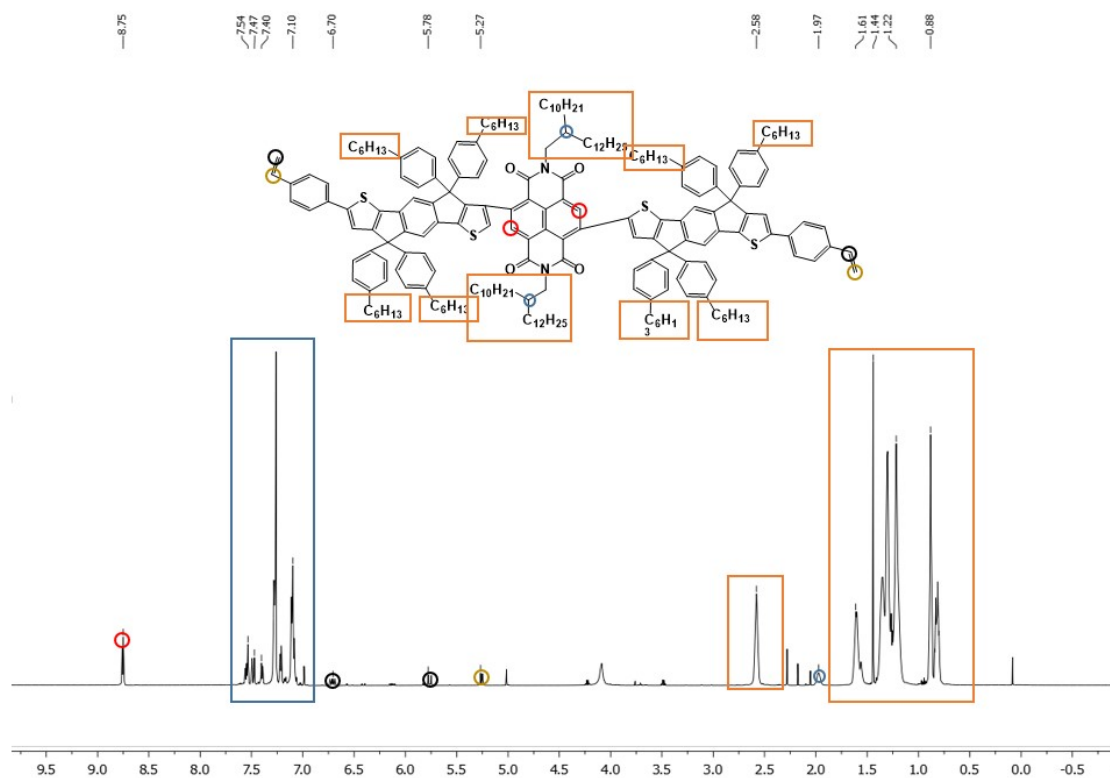

Figure S1 NMR spectrum of styryl endcapped P(IDT-NDI)

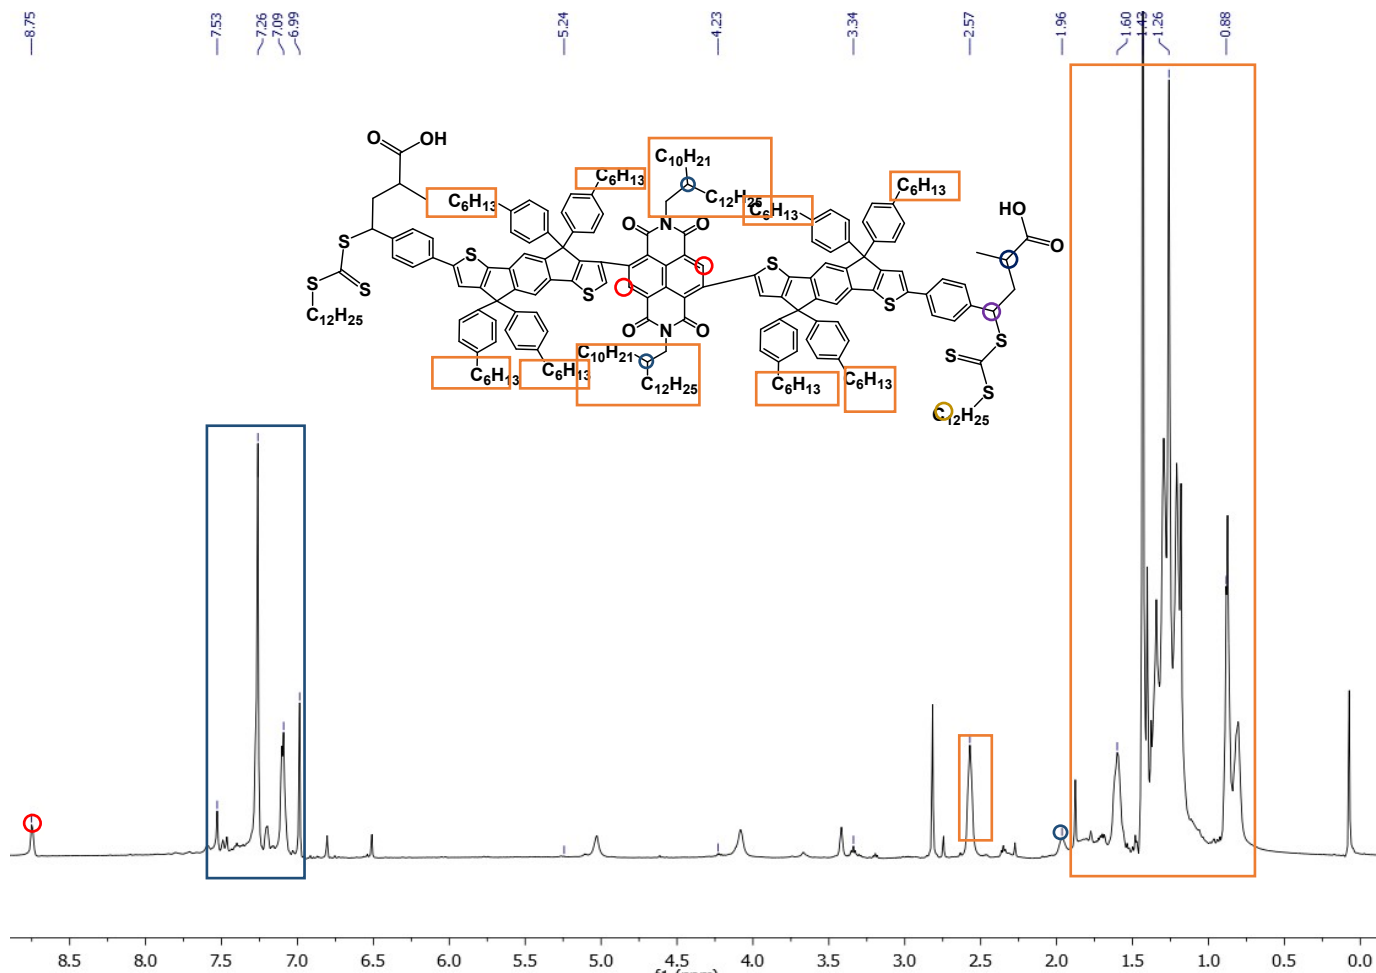

Figure S2 NMR Spectrum of P(IDT-NDI) Macro-CTA

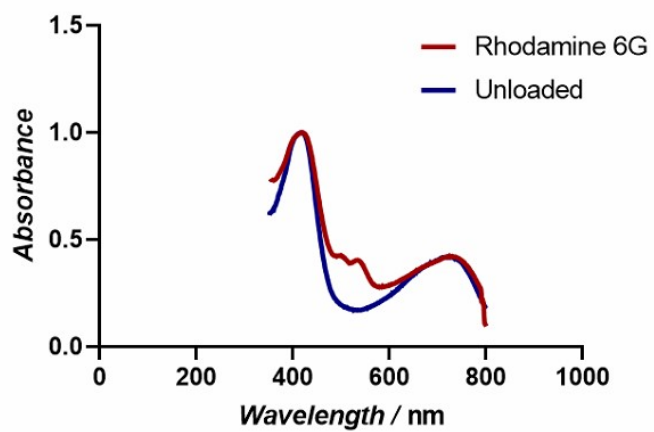

Figure S3 Absorbance spectra of unloaded micelles (blue), micelles loaded with Rhodamine (red)

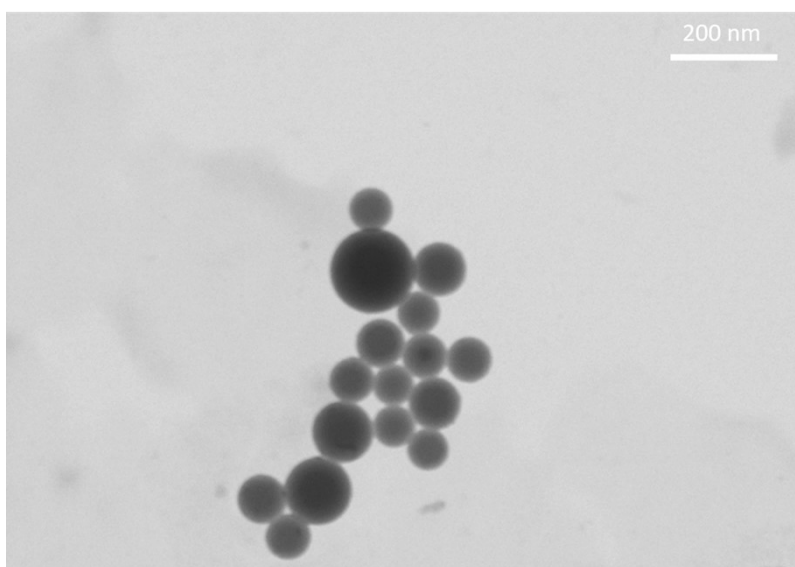

Figure S4 Widefield STEM figure of the obtained nanoaggregates
